# Supplementary material for: The effect of nickel doping on electron and phonon transport in the n-type nanostructured thermoelectric material CoSbS
Source: Royal Society of Chemistry journal article supplement (doi:10.1039/c5tc01560j), 2015-01-01
Supplement: c5tc01560j1.pdf [file c5tc01560j1.pdf]

## **Supporting information:**

### **The effect of Nickel doping on electron and phonon transport in n-type nanostructured thermoelectric material CoSbS**

**Zihang Liu<sup>a,b</sup>, Huiyuan Geng<sup>c</sup>, Jing Shuai<sup>a</sup>, Zhengyun Wang<sup>a</sup>, Jun Mao<sup>a</sup>, Dezhi Wang<sup>a</sup>, Qing Jie<sup>a</sup>, Wei Cai<sup>b</sup>, Jiehe Sui<sup>a,b,\*</sup> and Zhifeng Ren<sup>a\*</sup>**

<sup>a</sup> Department of Physics and TcSUH, University of Houston, Houston, TX 77204, United States

<sup>b</sup> National Key Laboratory for Precision Hot Processing of Metals and School of Materials Science and Engineering, Harbin Institute of Technology, Harbin 150001, China

<sup>c</sup> State Key Laboratory of Advanced Welding and Joining, Harbin Institute of Technology, Harbin 150001, China

\*To whom correspondence should be addressed. E-mail: [suijiehe@hit.edu.cn](mailto:suijiehe@hit.edu.cn), [zren@uh.edu](mailto:zren@uh.edu)

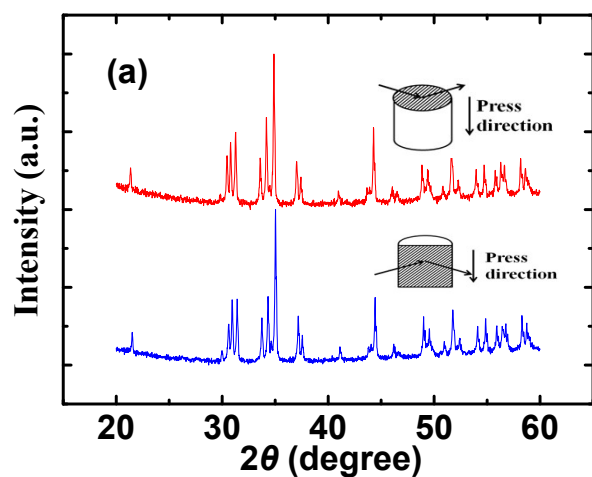

Figure S1. XRD patterns of planes perpendicular and parallel to the hot press direction of  $\text{Co}_{0.94}\text{Ni}_{0.06}\text{SbS}$  samples. insert: the schematic diagram of the measured sample.

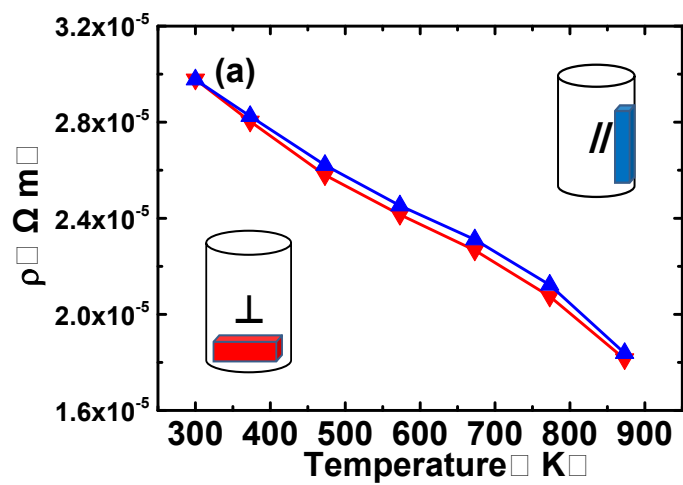

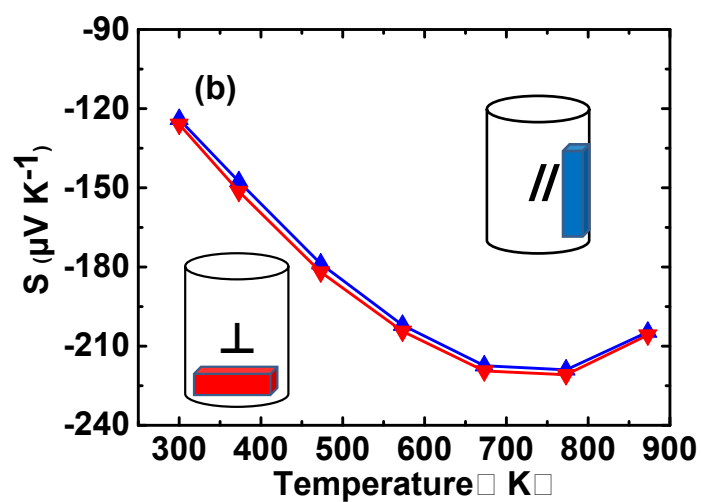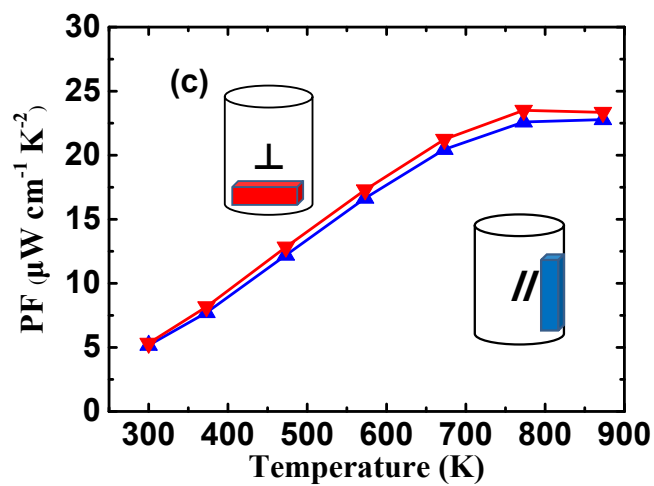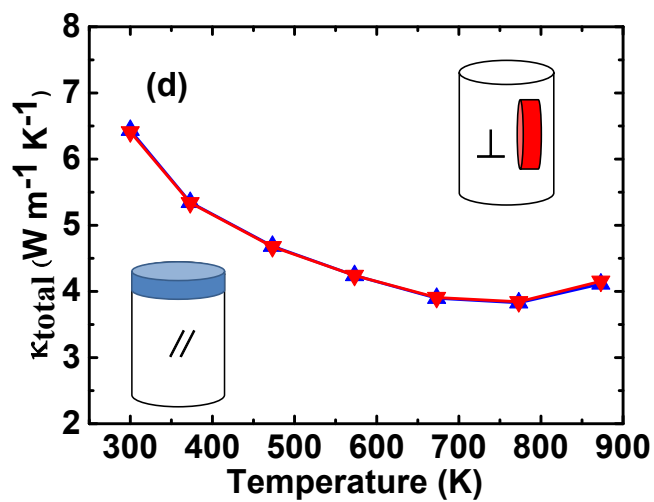

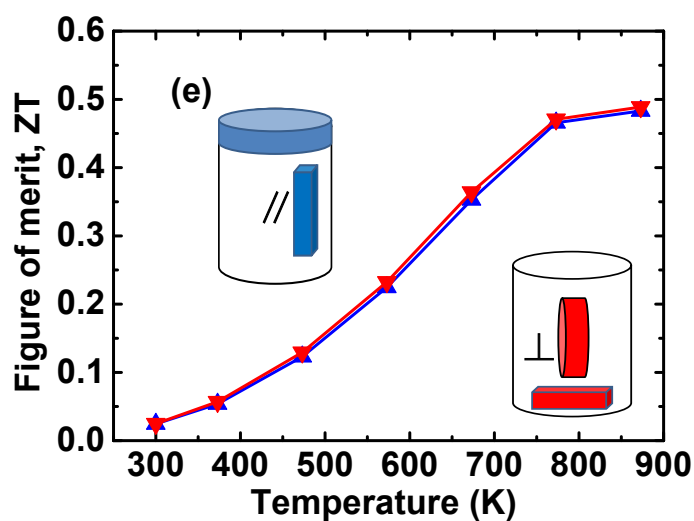

Figure S2. Temperature dependent thermoelectric performance for  $\text{Co}_{0.94}\text{Ni}_{0.06}\text{SbS}$  samples. (a) Electrical resistivity; (b) Seebeck coefficient; (c) Power factor; (d) Total thermal conductivity; (e) ZT values. insert: the schematic diagram of the measured sample.

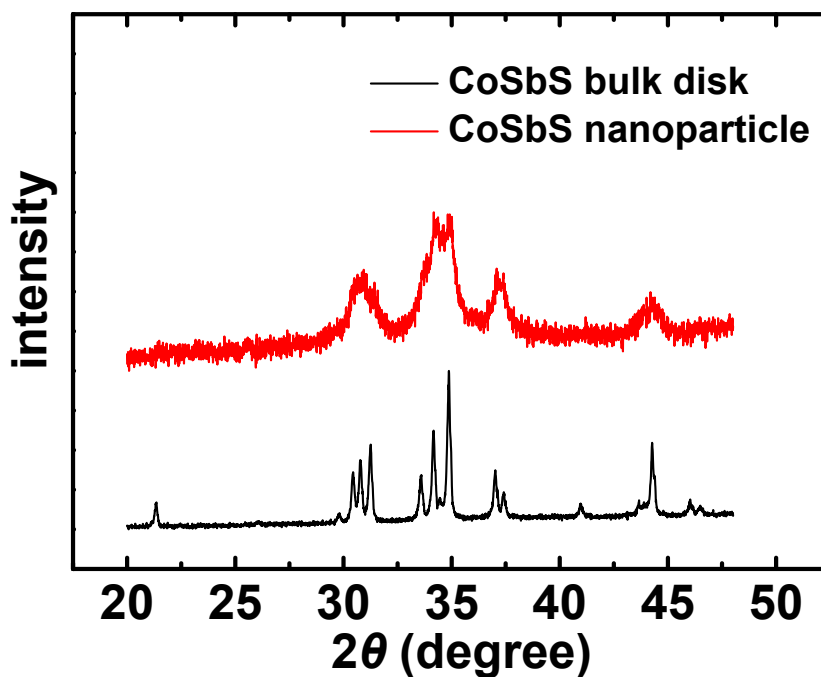

Figure S3. XRD patterns of hot pressed CoSbS bulk disk and ball-milling CoSbS nanoparticles.

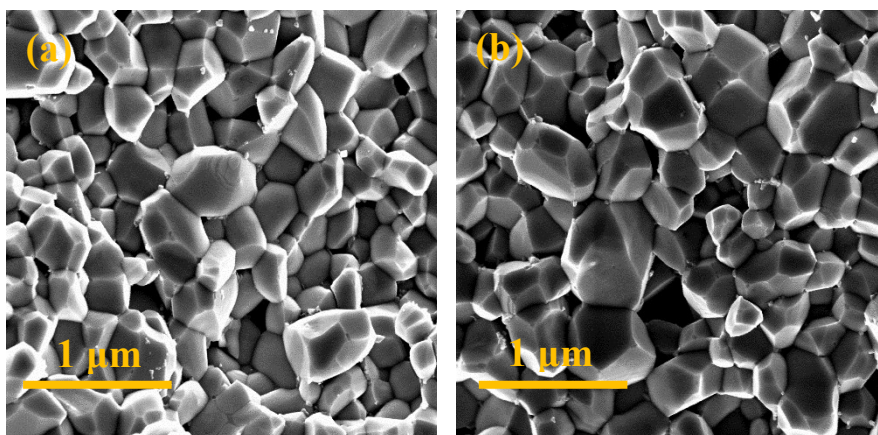

Figure S4. Typical SEM images of undoped CoSbS (a) and Co<sub>0.94</sub>Ni<sub>0.06</sub>SbS (b).

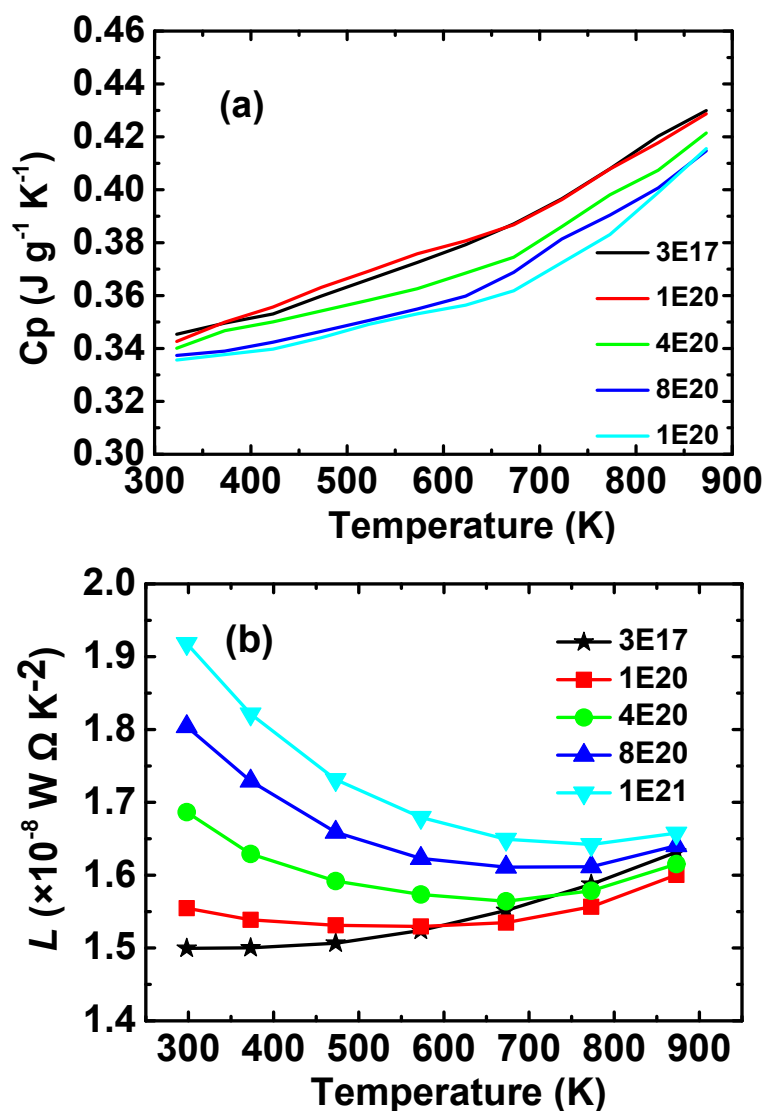

Figure S5. (a) Heat capacity and (b) The calculated Lorenz number as a function of temperature for Co<sub>1-x</sub>Ni<sub>x</sub>SbS.
